# Supplementary material for: Linarin, a Glycosylated Flavonoid, with Potential Therapeutic Attributes: A Comprehensive Review
Source: MDPI journal article supplement (doi:10.3390/ph14111104), 2021-10-29
Supplement: s1 [file s1]

**Table S1.** Isolation and identification of linarin from plant species.

| Family        | Plant species                                                          | Subjected Plant Part/ Soluble Extract     | Method of Isolation/Purification                                                                                | References |
|---------------|------------------------------------------------------------------------|-------------------------------------------|-----------------------------------------------------------------------------------------------------------------|------------|
| Asteraceae    | <i>Cirsium arvense</i>                                                 | AP/ MeOH                                  | CC [CHCl <sub>3</sub> -MeOH 1:0, 0:1]                                                                           | [13]       |
|               | <i>Cirsium arvense</i> subsp. <i>vestitum</i>                          | R/ nd                                     | CC [EtOH-DCM 1:1, 1:3]                                                                                          | [14]       |
|               | <i>Cirsium japonicum</i>                                               | AP/ nd                                    | CC, SLH                                                                                                         | [16]       |
|               | <i>Cirsium japonicum</i> var. <i>ussuriense</i> (Regel) Kitam. ex Ohwi | AP/ MeOH                                  | CC [CHCl <sub>3</sub> -MeOH-H <sub>2</sub> O 25:8:5]                                                            | [20]       |
|               | <i>Cirsium setidens</i>                                                | F/ MeOH                                   | CC [H <sub>2</sub> O-MeOH 0:100 to 100:0]                                                                       | [22]       |
|               | <i>Cirsium setosum</i> (Willd.) MB.                                    | nd/ EtOH                                  | CC [EtOH 20%, 40%, 60%, 80%, 100%]                                                                              | [25]       |
|               | <i>Chrysanthemum boreale</i>                                           | F/ MeOH                                   | CC [CHCl <sub>3</sub> -MeOH-H <sub>2</sub> O 70:30:10]                                                          | [26]       |
|               |                                                                        | F/ MeOH                                   | CC [MeOH-CHCl <sub>3</sub> 5-9%]                                                                                | [27]       |
|               | <i>Chrysanthemum morifolium</i> Ramat.                                 | F/ EtOH (95%)                             | CC [CHCl <sub>3</sub> - MeOH 10:0 to 1:9]                                                                       | [28]       |
|               | <i>Chrysanthemum Indicum</i>                                           | nd/ EtOH (80 %)                           | HSCCC [HEX-CHCl <sub>3</sub> -MeOH-H <sub>2</sub> O 0.5:4:3:2 - CHCl <sub>3</sub> -MeOH-H <sub>2</sub> O 4:3:2] | [39]       |
|               |                                                                        | F/ MeOH                                   | CC [EtOAc-MeOH-H <sub>2</sub> O 100:10:7]                                                                       | [33]       |
|               |                                                                        | AP/ DCM                                   | CC [DCM-MeOH 20:0 to 1:1]                                                                                       | [35]       |
|               | <i>Chrysanthemum zawadskii</i> var. <i>latilobum</i> Kitamura          | H/ MeOH                                   | recrys. (pyridine and MeOH)                                                                                     | [38]       |
|               |                                                                        | AP/ EtOAc                                 | CC [EtOAc- MeOH], recrys. (EtOAc-MeOH)                                                                          | [37]       |
|               | <i>Artemisia capillaris</i>                                            | WP/ MeOH                                  | CC [CH <sub>2</sub> Cl <sub>2</sub> -MeOH 20:1]                                                                 | [43]       |
|               | <i>Picnemon acarna</i>                                                 | AP/ PET, Bz, CHCl <sub>3</sub> , and MeOH | CC [MeOH]                                                                                                       | [44]       |
| Campanulaceae | <i>Lobelia chinensis</i> Lour.                                         | H/ MeOH                                   | Semi-preparative HPLC [H <sub>2</sub> O-MeOH 5-100%]                                                            | [66]       |
| Gentianaceae  | <i>Exacum macranthum</i>                                               | WP/ PET, CHCl <sub>3</sub> and MeOH       | recryst., hydrolysis [HCl-MeOH (6 %)]                                                                           | [65]       |
| Lamiaceae     | <i>Mentha arvensis</i>                                                 | F/ MeOH (80 %)                            | CC [CHCl <sub>3</sub> -MeOH-H <sub>2</sub> O (2.5% AA) 65:35:5]                                                 | [46]       |

|                  |                                    |                      |                                                                                                                                       |       |
|------------------|------------------------------------|----------------------|---------------------------------------------------------------------------------------------------------------------------------------|-------|
|                  | <i>Mentha spicata</i>              | AP/ EtOAc            | CC [HEX, HEX-EtOAc, EtOAc, EtOAc-MeOH, MeOH]                                                                                          | [48]  |
|                  | <i>Mentha piperita</i>             | AP/ EtOAc            | CC [HEX, HEX-EtOAc, EtOAc, EtOAc-MeOH, MeOH]                                                                                          | [48]  |
|                  | <i>Mentha villosa</i>              | AP/ EtOAc            | CC [HEX, HEX-EtOAc, EtOAc, EtOAc-MeOH, MeOH]                                                                                          | [48]  |
|                  | <i>Dracocephalum pteridifolium</i> | AP/ <i>n</i> -BuOH   | polyamide [EtOH:H <sub>2</sub> O 25:75-50:50-100:0]; SLH [MeOH:H <sub>2</sub> O (80:20)]                                              | [49]  |
|                  | <i>Leonurus japonicus</i>          | AP/ EtOH (95 %)      | CC [DCM-MeOH 100:1 – 0:100]                                                                                                           | [50]  |
|                  | <i>Calamintha glandulosa</i>       | L/ MeOH (80%)        | Semi-preparative HPLC [H <sub>2</sub> O-ACN 50 to 0%]                                                                                 | [52]  |
|                  | <i>Ziziphora clinopodioides</i>    | H/ MeOH              | nd                                                                                                                                    | [53]  |
| Malvaceae        | <i>Bombax malabaricum</i> DC.      | F/ HEX and MeOH      | polyamide [H <sub>2</sub> O–MeOH]; PC [ <i>n</i> -BuOH, H <sub>2</sub> O (15% AA) 4:1:5]                                              | [68]  |
| Poaceae          | <i>Avena sativa</i>                | nd/ EtOH (95%)       | CC [EtOH-H <sub>2</sub> O 0:100, 30:70, 60:40, 100:0]                                                                                 | [69]  |
| Ranunculaceae    | <i>Thalictrum aquilegifolium</i>   | WP/ MeOH             | CC [CHCl <sub>3</sub> -MeOH 20:1]; recryst. (pyridine-H <sub>2</sub> O)                                                               | [70]  |
| Rutaceae         | <i>Zanthoxylum affine</i>          | AP/ HEX              | CC [HEX-acetone 9:1, 85:15]                                                                                                           | [72]  |
|                  | <i>Buddleja davidii</i>            | L/ MeOH              | CPC [CHCl <sub>3</sub> -MeOH-H <sub>2</sub> O 45:33:22]                                                                               | [126] |
|                  | <i>Buddleja asiatica</i> Lour.     | WP/ EtOH (95%)       | CC [EtOAc-MeOH-H <sub>2</sub> O 9:1:0.1, 8:2:0.2, 7:3:0.3]                                                                            | [55]  |
|                  | <i>Buddleja cordata</i> Kunth      | WP/ MeOH             | CC [CHCl <sub>3</sub> -MeOH]                                                                                                          | [57]  |
|                  | <i>Buddleja officinalis</i>        | F/nd                 | nd                                                                                                                                    | [58]  |
| Scrophulariaceae |                                    | F/ MeOH              | CC [CHCl <sub>3</sub> -MeOH-H <sub>2</sub> O 5:1:0.1]                                                                                 | [60]  |
|                  | <i>Buddleja scordioides</i>        | AP/ HEX, MeOH, EtOAc | CC [CHCl <sub>3</sub> -MeOH 19:1, 9:1, 8:2]                                                                                           | [61]  |
|                  | <i>Linaria japonica</i>            | WP/ MeOH             | CC [CHCl <sub>3</sub> -MeOH 1:0 to 3:1], recryst. (MeOH), DCCC [CHCl <sub>3</sub> -MeOH-H <sub>2</sub> O- <i>n</i> -PrOH 45:60:40:10] | [62]  |

|               |                                                   |                    |                                                                         |       |
|---------------|---------------------------------------------------|--------------------|-------------------------------------------------------------------------|-------|
|               | <i>Linaria kurdica</i><br><i>subsp. eriocalyx</i> | WP/ <i>n</i> -BuOH | CC [CH <sub>2</sub> Cl <sub>2</sub> -MeOH 9:1, 8:2, 7:3],<br>SLH [MeOH] | [64]  |
|               | <i>Valeriana officinalis</i> L.                   | R/ EtOH (70 %)     | CC [MeOH CHCl <sub>3</sub> 20:80]                                       | [126] |
| Valerianaceae | <i>Valeriana wallzchzz</i> DC.                    | nd                 | PTLC [EtOAc-MeOH-H <sub>2</sub> O<br>200:33:27]                         | [127] |
| Verbenaceae   | <i>Lippia rubella</i>                             | AP/ EtOH (95 %)    | CCC [HEX-EtOAc-MeOH 4:2:05]                                             | [73]  |

AcOH: AP: aerial part, B: bud, Bz: benzene, CC: column chromatography on silica gel, CCC: counter-current chromatography, CHCl<sub>3</sub>: chloroform, CPC: centrifugal partition chromatography, DCCC: droplet countercurrent chromatograph, DCM: dichloromethane, ETH: ether, EtOAc: ethyl acetate, EtOH: ethanol, F: flower, FA: formic acid, GAA: glacial acetic acid, H: herb, H<sub>2</sub>O: water, HCl: hydrochloric acid; HCO<sub>2</sub>H: formic acid, HSCCC: high-speed counter-current chromatography, ACN: acetonitrile, MeOH: methanol, *n*-BuOH: *n*-butanol, *n*-PrOH: *n*- propanol, HEX: *n*-hexane, nd: not determined, PC: paper chromatography, PET: petroleum ether, PTLC: preparative thin layer chromatography, R: root, recryst.: recrystallization, SL: solid-liquid extraction, SLH: Sephadex® LH-20, WP: whole part.

**Table S2.** Identification and characterization of linarin from plant species.

| Family     | Plant species                                                          | Subjected Plant Part/<br>Soluble Extract                                 | Analytical<br>Instrument | Eluent System for Chromatography                   | Quantity                                                                         | References |
|------------|------------------------------------------------------------------------|--------------------------------------------------------------------------|--------------------------|----------------------------------------------------|----------------------------------------------------------------------------------|------------|
| Asteraceae | <i>Cirsium arvense</i>                                                 | AP/ MeOH                                                                 | HPLC-UV                  | nd                                                 | nd                                                                               | [13]       |
|            | <i>Cirsium arvense</i> subsp.<br><i>vestitum</i>                       | R/ nd                                                                    | HPLC-<br>MicroTOF-Q      | nd                                                 | 15 mg                                                                            | [14]       |
|            | <i>Cirsium canum</i> (L.)                                              | F/<br>MeOH (50%)<br>MeOH (80%)<br>MeOH (100%)<br>DCM<br>Acetone<br>EtOAc | HPLC-DAD                 | H <sub>2</sub> O (1% AA)-MeOH [2 to 75%]           | 121.75 µg/g<br>116.12 µg/g<br>44.13 µg/g<br>1.94 µg/g<br>10.51 µg/g<br>8.94 µg/g | [15]       |
|            |                                                                        |                                                                          |                          |                                                    |                                                                                  |            |
|            |                                                                        |                                                                          |                          |                                                    |                                                                                  |            |
|            |                                                                        |                                                                          |                          |                                                    |                                                                                  |            |
|            |                                                                        |                                                                          |                          |                                                    |                                                                                  |            |
|            | <i>Cirsium japonicum</i>                                               | AP/ MeOH                                                                 | HPLC-MS                  | H <sub>2</sub> O-ACN (0.025% TFA) [80:20 to 5:95]  | 0.26–1.15 mg/100 g                                                               | [16]       |
|            | <i>Cirsium japonicum</i> var. <i>maackii</i>                           | nd/ EtOH                                                                 | HPLC                     | ACN-H <sub>2</sub> O (0.5% AA)                     | nd                                                                               | [19]       |
|            | <i>Cirsium japonicum</i> var. <i>ussuriense</i> (Regel) Kitam. ex Ohwi | AP/ MeOH                                                                 | nd                       | nd                                                 | nd                                                                               | [20]       |
|            | <i>Cirsium rivulare</i>                                                | L/ MeOH                                                                  | HPLC                     | ACN-H <sub>2</sub> O (1% AA) [10:90, 30:70, 10:90] | 170 mg/g                                                                         | [21]       |
|            |                                                                        | F/ MeOH                                                                  | HPLC                     | ACN-H <sub>2</sub> O (1% AA) [10:90, 30:70, 10:90] | 20 mg/g                                                                          |            |
|            | <i>Cirsium setidens</i>                                                | F/ MeOH                                                                  | HPLC                     | H <sub>2</sub> O (0.1% FA)-ACN                     | 120.3 mg/g                                                                       | [22]       |
|            | <i>Cirsium setosum</i> (Willd.) MB.                                    | AP/ nd                                                                   | HPLC                     | H <sub>2</sub> O-ACN (0.025% TFA) [80:20 to 5:95]  | 0.3-2 mg/100 g                                                                   | [16]       |
|            |                                                                        |                                                                          | HPLC-MS                  | H <sub>2</sub> O-ACN (0.1% TFA) [80:20 to 5:95]    | nd                                                                               |            |

|                                        |                       |                 |                                                                                         |                                                                                                        |      |
|----------------------------------------|-----------------------|-----------------|-----------------------------------------------------------------------------------------|--------------------------------------------------------------------------------------------------------|------|
|                                        | AP/ nd                | LC              | H <sub>2</sub> O (0.5% AA)-ACN [87:13, 75:25, 60:40, 90:10, 80:20]                      | 1.920-4.315 mg/g                                                                                       | [23] |
|                                        |                       | LC-MS           | H <sub>2</sub> O (0.5% AA)-ACN [35 to 50%]                                              |                                                                                                        |      |
|                                        | nd/ EtOH (70 %)       | LC              | MeOH-H <sub>2</sub> O (0.1% AA) [35:65, 60:40, 70:30, 86:14, 95:5]                      | 1.524 - 21.213 mg/ g                                                                                   | [24] |
|                                        |                       | HPLC            | MeOH-H <sub>2</sub> O [50:50]                                                           |                                                                                                        |      |
|                                        | nd/ EtOH              | UPLC-MS         | H <sub>2</sub> O (0.1% FA)-ACN (0.1% FA) [90:10, 70:30, 70:30, 45:55, 5:95]             | nd                                                                                                     | [25] |
| <i>Hemistepta lyrata</i>               | F/ MeOH               | HPLC-UV         | H <sub>2</sub> O (TFA 0.05%)-MeOH+ACN (60:40) (+TFA 0.05%) [85:15, 35:65, 0:100, 85:15] | 0.06-4.26 mg/g                                                                                         | [26] |
| <i>Chrysanthemum morifolium</i> Ramat. | F/ EtOH (95%)         | HPLC-DAD-ESI/MS | H <sub>2</sub> O (0.1% FA)-ACN (0.1% FA) [85:15, 65:35, 40:60, 5:95, 85:15 ]            | 0.117-0.582 mg/g                                                                                       | [28] |
| <i>Chrysanthemum Indicum</i>           | F/ MeOH               | HPLC/DAD        | H <sub>2</sub> O (0.05% H <sub>3</sub> PO <sub>4</sub> )-ACN [88 to 74%]                | nd                                                                                                     | [31] |
|                                        | F/ EtOH (80 %)        | HPLC-UV         | H <sub>2</sub> O-ACN (0.1% H <sub>3</sub> PO <sub>4</sub> ) [15-80%]                    | 32.8 mg/g                                                                                              | [39] |
|                                        | AP (L,S,F)/ DCM       |                 |                                                                                         |                                                                                                        |      |
|                                        | L                     | UPLC            | ACN-H <sub>2</sub> O (0.1% FA) [5:95, 15:85, 25:75, 40:60, 55:45, 100:0, 5:95]          | 1.47 g/100g                                                                                            | [35] |
|                                        | S                     |                 |                                                                                         | 0.65 g/100 g                                                                                           |      |
|                                        | F                     |                 |                                                                                         | 0.64 g/100g                                                                                            |      |
|                                        | WP (R,S,L,F,FB)/ MeOH | HPLC-MS         | H <sub>2</sub> O (0.1% FA)-ACN (0.1% FA) [72:28 to 28:72]                               | R: 0.364 µg/mg FW<br>S: 0.133 µg/mg FW<br>L: 0.070 µg/mg FW<br>F: 0.052 µg/mg FW<br>FB: 0.064 µg/mg FW | [34] |
|                                        | nd/ EtOH (75 %)       | HPLC-UV         | MeOH-H <sub>2</sub> O (+AA) [50:49.95:0.05]                                             |                                                                                                        |      |
|                                        |                       | HPLC-DAD        | MeOH-H <sub>2</sub> O (0.2% AA) [40:60, 50:50, 100:0]                                   | 55.68-2.08 %                                                                                           | [36] |
|                                        | F/ MeOH               | HPLC-UV         | H <sub>2</sub> O (0.4% FA)-ACN (0.4% FA) [100:0, 90:10, 80:20]                          | nd                                                                                                     | [32] |
|                                        | F and B/ EtOH (95 %)  | HPLC-DAD        | ACN-H <sub>2</sub> O (0.1% FA) [5:95, 15:85, 30:70, 50:50]                              | 48.3 mg/g                                                                                              | [30] |
|                                        | F/ EtOH               | HPLC-UV         | H <sub>2</sub> O (0.1% AA)-MeOH [52:48]                                                 | 28.85-88.11%                                                                                           | [40] |

|                      |                                             |                 |                   |                                                                                                                           |                 |      |
|----------------------|---------------------------------------------|-----------------|-------------------|---------------------------------------------------------------------------------------------------------------------------|-----------------|------|
|                      |                                             | nd/ MeOH (60%)  | HPLC-DAD-MS       | ACN (0.1% FA)-H <sub>2</sub> O (0.1% FA) [10:90, 26:74, 65:35, 100:0]                                                     | nd              | [41] |
|                      |                                             | nd/ MeOH        | HPLC-DAD          | ACN-H <sub>2</sub> O (1% AA) [10:90, 30:70, 10:90]                                                                        | 14.6-15.3 µg/g  | [42] |
| <i>Campanulaceae</i> | <i>Lobelia chinensis</i> Lour.              | H/ MeOH         | LC-MS             | MeOH-H <sub>2</sub> O [5:95 to 100:0]                                                                                     | nd              | [66] |
|                      |                                             |                 | HPLC-DDA-MS       | ACN-H <sub>2</sub> O [5:95, 30:70, 70:30]                                                                                 | nd              |      |
| <i>Lamiaceae</i>     | <i>Mentha arvensis</i>                      | F/ MeOH (80 %)  | HPLC-UV           | ACN-H <sub>2</sub> O [5:95 to 95:5]                                                                                       | 6 %             | [46] |
|                      |                                             | AP/ MeOH (80 %) | HPLC-DAD          | MeOH-H <sub>2</sub> O (+AA) (10:88:2); MeOH-H <sub>2</sub> O (+AA) (90:8:2) [95:5, 90:10, 75:25, 65:35, 0:100]            | nd              | [47] |
|                      |                                             |                 | UPLC-ESI/Q-TOF/MS | ACN-H <sub>2</sub> O (0.1% FA) [10 to 95% ACN]                                                                            |                 |      |
|                      | <i>Mentha haplocalyx</i>                    | nd              | HPLC-MS/MS        | ACN-H <sub>2</sub> O (0.3% FA) [5:95, 15:85, 19.5:80.5, 22:78, 30:70]                                                     | nd              | [76] |
|                      | <i>Mentha spicata</i>                       | AP/ EtOAc       | HPLC-UV           | ACN-H <sub>2</sub> O (2.5% FA) [15:85, 25:75, 100:0]                                                                      | 2.79-42.21 mg/g | [48] |
|                      | <i>Mentha piperita</i>                      | AP/ EtOAc       | HPLC-UV           | ACN-H <sub>2</sub> O (2.5% FA) [15:85, 25:75, 100:0]                                                                      | 0.04-0.27 mg/g  | [48] |
|                      | <i>Mentha villosa</i>                       | AP/ EtOAc       | HPLC-UV           | ACN-H <sub>2</sub> O (2.5% FA) [15:85, 25:75, 100:0]                                                                      | 0.26-17.93 mg/g | [48] |
|                      | <i>Acinos arvensis</i> ssp. <i>Villosus</i> | L/ MeOH (80%)   | HPLC-UV           | H <sub>2</sub> O-MeOH [50:50, 40:60, 0:100]                                                                               | nd              | [52] |
|                      | <i>Acinos hungaricus</i>                    | L/ MeOH (80%)   | HPLC-UV           | H <sub>2</sub> O-MeOH [50:50, 40:60, 0:100]                                                                               | nd              | [52] |
|                      | <i>Calamintha officinalis</i>               | L/ MeOH (80%)   | HPLC-UV           | H <sub>2</sub> O (0.85% H <sub>3</sub> PO <sub>4</sub> )-ACN-MeOH [100:0:0, 87:13:0, 72:19:9, 12:70:18, 5:80:15, 100:0:0] | 0.27 mg/g       | [51] |
|                      | <i>Calamintha glandulosa</i>                | L/ MeOH (80%)   | HPLC-UV           | H <sub>2</sub> O-MeOH [50:50, 40:60, 0:100]                                                                               | nd              | [52] |
|                      | <i>Micromeria albanica</i>                  | L/ MeOH (80%)   | HPLC-UV           | H <sub>2</sub> O-MeOH [50:50, 40:60, 0:100]                                                                               | nd              | [52] |
|                      | <i>Micromeria cristata</i>                  | L/ MeOH (80%)   | HPLC-UV           | H <sub>2</sub> O-MeOH [50:50, 40:60, 0:100]                                                                               | nd              | [52] |
|                      | <i>Micromeria dalmatica</i>                 | L/ MeOH (80%)   | HPLC-UV           | H <sub>2</sub> O-MeOH [50:50, 40:60, 0:100]                                                                               | nd              | [52] |

|                  |                                              |                           |                    |                                                                     |                   |      |
|------------------|----------------------------------------------|---------------------------|--------------------|---------------------------------------------------------------------|-------------------|------|
|                  | <i>Micromeria Juliana</i>                    | L/ MeOH (80%)             | HPLC-UV            | H <sub>2</sub> O-MeOH [50:50, 40:60, 0:100]                         | nd                | [52] |
|                  | <i>Micromeria thymifolia</i>                 | L/ MeOH (80%)             | HPLC-UV            | H <sub>2</sub> O-MeOH [50:50, 40:60, 0:100]                         | nd                | [52] |
|                  | <i>Satureja cuneifolia</i>                   | L/ MeOH (80%)             | HPLC-UV            | H <sub>2</sub> O-MeOH [50:50, 40:60, 0:100]                         | nd                | [52] |
|                  | <i>Satureja kitaibelii</i>                   | L/ MeOH (80%)             | HPLC-UV            | H <sub>2</sub> O-MeOH [50:50, 40:60, 0:100]                         | nd                | [52] |
|                  | <i>Satureja montana</i> ssp. <i>Montana</i>  | L/ MeOH (80%)             | HPLC-UV            | H <sub>2</sub> O-MeOH [50:50, 40:60, 0:100]                         | nd                | [52] |
|                  | <i>Ziziphora clinopodioides</i>              | nd/ EtOH (70%)            | UPLC-Q-TOF-MS      | H <sub>2</sub> O (0.1% FA)-ACN [5 to 100 ACN]                       | nd                | [77] |
|                  |                                              | H/ MeOH                   | RP-RRLC            | H <sub>2</sub> O (1% AA)-MeOH [85:15, 60:40, 45:55]                 | 3.15-20.55 mg/g   | [53] |
| Ranunculaceae    | <i>Coptis chinensis</i>                      | F/ EtOH (70 %)            | HPLC-MS            | H <sub>2</sub> O (0.1% FA) [85:75 to 75:55]                         | nd                | [71] |
| Rutaceae         | <i>Zanthoxylum affine</i>                    | AP/ HEX, Acetone and MeOH | HPLC-Q-TOF-MS      | H <sub>2</sub> O (0.01% FA)-MeOH [80:20, 50:50, 10:90, 80:20]       | nd                | [72] |
|                  | <i>Buddleja davidii</i> and <i>B. nitida</i> | L/ MeOH                   | LC-MS/MS           | H <sub>2</sub> O-MeOH [15 to 100% MeOH]                             | nd                | [54] |
| Scrophulariaceae | <i>Buddleja cordata</i> Kunth                | L/ EtOH (70 %)            | HPLC-DAD           | H <sub>2</sub> O (2% AA)-ACN [100:0, 75:25, 0:100, 100:0]           | 41.81 ± 5.21 mg/g | [56] |
|                  |                                              | White callus/ EtOH (70 %) |                    |                                                                     | 2.12 ± 0.21 mg/g  |      |
|                  |                                              | Green callus/ EtOH (70 %) |                    |                                                                     | 2.34 ± 0.13 mg/g  |      |
|                  |                                              | R/ EtOH (70 %)            |                    |                                                                     | 3.01 ± 0.5 mg/g   |      |
|                  | <i>Buddleja officinalis</i>                  | F/ EtOH (70 %)            | UHPLC-LTQ-Orbitrap | H <sub>2</sub> O (0.1% FA)-ACN [90:10, 60:40, 10:90, 90:10]         | nd                | [59] |
|                  | <i>Linaria vulgaris</i>                      | nd/infusion               | HPLC-UV            | H <sub>2</sub> O (5% FA)-MeOH [50:50, 40:60]                        | 3840.9 mg/kg      | [63] |
| Valerianaceae    | <i>Valeriana edulis</i>                      | nd/ MeOH                  | HPLC-DAD           | H <sub>2</sub> O-ACN (50% in MeOH, 1:1) [98:2, 83:17, 50:50, 0:100] | <0.002%           | [78] |

|                                 |          |          |                                                                     |        |      |
|---------------------------------|----------|----------|---------------------------------------------------------------------|--------|------|
| <i>Valeriana officinalis</i> L. | nd/ MeOH | HPLC-DAD | H <sub>2</sub> O-ACN (50% in MeOH, 1:1) [98:2, 83:17, 50:50, 0:100] | 0.002% | [78] |
| <i>Valeriana jatamansi</i>      | nd/ MeOH | HPLC-DAD | H <sub>2</sub> O-ACN (50% in MeOH, 1:1) [98:2, 83:17, 50:50, 0:100] | 0.24%  | [78] |
| <i>Valeriana procera</i>        | nd/ MeOH | HPLC-DAD | H <sub>2</sub> O-ACN (50% in MeOH, 1:1) [98:2, 83:17, 50:50, 0:100] | 0.07%  | [78] |
| <i>Valeriana sitchensis</i>     | nd/ MeOH | HPLC-DAD | H <sub>2</sub> O-ACN (50% in MeOH, 1:1) [98:2, 83:17, 50:50, 0:100] | 0.03%  | [78] |

AA: acetic acid, ACN: acetonitrile, AP: aerial part, DCM: dichloromethane, B: bud, DAD: diode array detector, ESI: electrospray ionization, EtOAc: ethyl acetate, EtOH: ethanol, F: flower, FB: flower bud, FW: fresh weight, H: herb, H<sub>3</sub>PO<sub>4</sub>: phosphoric acid, H<sub>2</sub>O: water, FA: formic acid, HPLC: high-performance liquid chromatography, L: leaf, LC: liquid chromatography, MeOH: methanol, MS: mass spectrometry, NHEX: *n*-hexane, nd: not determined, QTOF: quadrupole and a time-of-flight analyzer, R: root, RP: reverse phase, RRLC: rapid-resolution liquid chromatography, S: stem, TFA: trifluoroacetic acid, UPLC: ultra-performance liquid chromatography, UV: ultraviolet-Visible, WP: whole part.



**Table S3.** Biological properties of linarin.

| Activity                               | Isolated from plant/prepared           | Measure of activity                                                                                                                                                                | Assay                        | Experimented media  | Positive controls    | Activity of controls                                    | Cell lines/Strain/Model                                            | References |
|----------------------------------------|----------------------------------------|------------------------------------------------------------------------------------------------------------------------------------------------------------------------------------|------------------------------|---------------------|----------------------|---------------------------------------------------------|--------------------------------------------------------------------|------------|
| <b>Acetylcholinesterase-Inhibitory</b> | <i>Buddleja davidii</i><br>MeOH ex. L  | D.L.: 10 ng                                                                                                                                                                        | Bioautographic (TLC)         | In vitro            | Huperzine A          | D.L.: 1 ng                                              | -                                                                  | [54]       |
|                                        | purchased                              | IC <sub>50</sub> : 3.801 ± 1.149 µM (in vitro)<br>I.D.: 140 mg/Kg                                                                                                                  | Ellman's colorimetric        | In vitro<br>Ex vivo | Huperzine A          | I.D.: 0.5 mg/kg                                         | Mouse brain (in vitro)<br>cortex and hippocampus of mice (ex vivo) | [80]       |
|                                        | prepared                               | DRR: 76.8% (at C: 16.7 µg/mL)<br>DRR: 88.0% (at C: 50 µg/mL)                                                                                                                       | molecular docking simulation | In vivo             | Donepezil            | DRR: 79.3% (at C: 8 µM)<br>DRR: 22.6% (at C: 5.6 µg/mL) | Zebrafish                                                          | [81]       |
| <b>Analgesic (Antinociceptive)</b>     | <i>Buddleia cordata</i><br>Aqueous ex. | A.W.: 18.6 ± 3.3; P: 38% (at D: 25 mg/kg)<br>A.W.: 16.6 ± 2.3; P: 45% (at D: 50 mg/kg)<br>A.W.: 14.5 ± 1.0; P: 52% (at D: 100 mg/kg)<br>A.W.: 12.8 ± 3.8; P: 57% (at D: 200 mg/kg) | Writhing test                | In vivo             | Morphine sulphate    | A.W.: 4.7 ± 0.6; P: 90% (D: 1.15 mg/kg)                 | mice                                                               | [101]      |
|                                        |                                        |                                                                                                                                                                                    |                              |                     | acetylsalicylic acid | A.W.: 10.6 ± 2.7; P: 65% (D: 200 mg/kg)                 |                                                                    |            |
|                                        |                                        |                                                                                                                                                                                    |                              |                     | Morphine sulphate    | V: 68% (D: 3 mg/kg)                                     |                                                                    |            |
|                                        |                                        |                                                                                                                                                                                    | Hot-plate test               |                     | acetylsalicylic acid | V: 8% (D: 100 mg/kg)                                    |                                                                    |            |
|                                        |                                        | V: 55% (at D: 100 mg/kg)                                                                                                                                                           |                              |                     |                      |                                                         |                                                                    |            |
|                                        | <i>Buddleia cordata</i><br>Aqueous ex. | ED <sub>50</sub> : 89.0 mg/kg                                                                                                                                                      | Hot-plate test               | In vivo             | acetylsalicylic acid | ED <sub>50</sub> : 28.3 mg/kg                           | mice                                                               | [128]      |

|             |                                |                                                                                                                                                                                             |     |                     |                               |                                                                                                                                                                                                                                        |                         |       |
|-------------|--------------------------------|---------------------------------------------------------------------------------------------------------------------------------------------------------------------------------------------|-----|---------------------|-------------------------------|----------------------------------------------------------------------------------------------------------------------------------------------------------------------------------------------------------------------------------------|-------------------------|-------|
| Anti-cancer | purchased                      | I: 3.1-fold for NFATc1 gene (at C: 0 µg/mL)<br>I: 2.2-fold for NFATc1 gene (at C: 0.1 µg/mL)<br>I: 2.2-fold for NFATc1 gene (at C: 1 µg/mL)<br>I: 1.8-fold for NFATc1 gene (at C: 10 µg/mL) | nd  | nd                  | nd                            | nd                                                                                                                                                                                                                                     | Bone marrow macrophages | [129] |
|             |                                | I: 3.8-fold for TRAP gene (at C: 0 µg/mL)<br>I: 2.6-fold for TRAP gene (at C: 0.1 µg/mL)<br>I: 2.3-fold for TRAP gene (at C: 1 µg/mL)<br>I: 2.1-fold for TRAP gene (at C: 10 µg/mL)         |     |                     |                               |                                                                                                                                                                                                                                        |                         |       |
|             | <i>Buddleja officinalis</i>    | Collagen: 85~105%<br>C.V: 45~100%<br>ALP activity: 85~108%<br>M: 80~100%<br>MDA: 100~200%<br>PCO: 100~130%<br>OCN: 55~100%<br>RANKL: 100~250%                                               | MTT | In vivo<br>In vitro | H <sub>2</sub> O <sub>2</sub> | Collagen :44.79 ± 1.11 lg/10 <sup>6</sup><br>ALP: 3.61 ± 0.07 U/10 <sup>6</sup><br>M:1.11 ± 0.01 POC and<br>MDA:2.78 ± 0.16 and 5.34 ± 0.09 nmol/mg<br>OCN: s 6.84 ± 0.30 ng/10 <sup>6</sup><br>RANKL: 14.33 ± 0.67 pg/10 <sup>6</sup> | cell                    | [58]  |
|             | <i>Chrysanthemum zawadskii</i> | RHR: (60 % and 40 %)                                                                                                                                                                        | –   | –                   | SD                            | –                                                                                                                                                                                                                                      | –                       | [130] |

|                                                            |                                    |                    |                     |            |                                                        |                           |      |
|------------------------------------------------------------|------------------------------------|--------------------|---------------------|------------|--------------------------------------------------------|---------------------------|------|
| hydro-methanolic<br>(80%) ex./AP                           |                                    |                    |                     |            |                                                        |                           |      |
| <i>Dendranthema<br/>zawadskii</i> var.<br><i>latilobum</i> | –                                  | –                  | –                   | –          | –                                                      | –                         | [37] |
| EtOAc ex./AP                                               |                                    |                    |                     |            |                                                        |                           |      |
| <i>Chrysanthemum<br/>indicum</i>                           | CP: (1~1.5)<br>CV: (80~95)(%)      | –                  | –                   | FBS        | FBS: 10 %                                              | A549 Human<br>lung cancer | [32] |
| <i>Chrysanthemum<br/>indicum</i>                           | TNF- $\alpha$ : (200 pg/ml)        | cycle<br>threshold | –                   | ALT<br>AST | ALT: 31.37 $\pm$ 8.7<br>U/L<br>AST: 39.27 $\pm$ 2.8    | Mouse liver               | [33] |
|                                                            | IL-6: (500 pg/ml)                  |                    |                     |            |                                                        |                           |      |
|                                                            | IFN- $\gamma$ : (90 pg/ml)         |                    |                     |            |                                                        |                           |      |
|                                                            | TNF- $\alpha$ mRNA: (150<br>pg/ml) |                    |                     |            |                                                        |                           |      |
|                                                            | IL-6 mRNA: (180 pg/ml)             |                    |                     |            |                                                        |                           |      |
|                                                            | IFN- $\gamma$ mRNA: (0.3<br>pg/ml) |                    |                     |            |                                                        |                           |      |
|                                                            | TLR4: 1.2                          |                    |                     |            |                                                        |                           |      |
|                                                            | IRAK: 2                            |                    |                     |            |                                                        |                           |      |
|                                                            | Cytosolic: 4                       |                    |                     |            |                                                        |                           |      |
|                                                            | FADD protein: 0.8                  |                    |                     |            |                                                        |                           |      |
| <i>Flos Chrysanthemi<br/>Indici</i>                        | caspase-3: 0.2                     | HSCCC              | In vitro<br>In vivo |            | Mineralization:<br>150%<br>P-AKT/AKT: 8%<br>Runx2: 7 % | mice                      | [39] |
|                                                            | caspase 8: 0.5                     |                    |                     |            |                                                        |                           |      |
|                                                            | P_Bim <sup>LE</sup> : 0.5          |                    |                     |            |                                                        |                           |      |
|                                                            | P_Bim <sup>L</sup> : 1.8           |                    |                     |            |                                                        |                           |      |
|                                                            | Bcl-Xl: 2.8                        |                    |                     |            |                                                        |                           |      |
|                                                            | P_STAT3: 2.1                       |                    |                     |            |                                                        |                           |      |
|                                                            | ALP activity                       |                    |                     |            |                                                        |                           |      |
|                                                            | :(13,15)(OD/mg)                    |                    |                     |            |                                                        |                           |      |
|                                                            | COL-I:(5,7)(OD/mg)                 |                    |                     |            |                                                        |                           |      |
|                                                            | OCN:(4,6)(OD/mg)                   |                    |                     |            |                                                        |                           |      |
| <i>Flos Chrysanthemi<br/>Indici</i>                        | OPN: (4,5)(OD/mg)                  | HSCCC              | In vitro<br>In vivo |            | Mineralization:<br>150%<br>P-AKT/AKT: 8%<br>Runx2: 7 % | mice                      | [39] |
|                                                            | Runx2:(5,6)((OD/mg)                |                    |                     |            |                                                        |                           |      |

|                                                  |                                                                                                                                                                                                                                                            |     |                     |                    |                                                                                                                 |                            |       |
|--------------------------------------------------|------------------------------------------------------------------------------------------------------------------------------------------------------------------------------------------------------------------------------------------------------------|-----|---------------------|--------------------|-----------------------------------------------------------------------------------------------------------------|----------------------------|-------|
| CCK-A:(1.2,1.5,2)%                               |                                                                                                                                                                                                                                                            |     |                     |                    |                                                                                                                 |                            |       |
| <i>Cirsium arvense</i><br>subsp. <i>Vestitum</i> | –                                                                                                                                                                                                                                                          | –   | in vitro            | BHT, BHA           | I C6: (-10~20)%<br>I HeLa: (0~5)%                                                                               | mice                       | [14]  |
| <i>Flos Chrysanthemi</i><br><i>Indici</i>        | ALP: (1~7 day)(10~20)(<br>OD/mg)<br>M:(110~270)%                                                                                                                                                                                                           | –   | In vivo<br>In vitro | –                  | Collagen: 2.8%<br>ALP: 4%<br>OCN:2.7%<br>BSP:3%<br>RUNX2:4.5%<br>BMP-2:<br>(150~280)%<br>SMAD1/5:<br>(210~400)% | mice                       | [87]  |
| <i>Flos Chrysanthemi</i><br><i>Indici</i>        | DEVDase activity: 0.12<br>Colony fotmation:20%<br>Oligo nucleosome:4<br>unit/flod<br>Apoptotic cell:75%<br>Mitochondria<br>members:40%<br>cytochrome c (Cyto-c): (<br>02.~,5.6) flod of con<br>ROS production:40%<br>JNK activation:<br>(4,4.5)flod of con | MTT | In vivo<br>In vitro | KI-67 and<br>TUNEL | tumor weight: 1<br>g<br>KI-67: 20%<br>TUNEL:56%                                                                 | human glioma cells<br>mice | [131] |
| Purchased                                        | RP: (70,90)%<br>RC: (160,170)%<br>RR: (1.5,1.7,2)%<br>LVSP: (75~110)%<br>CF: (3.2~6.5)(ml/min)                                                                                                                                                             | MTT | in vitro<br>in vivo | –                  | SOD: 0.115±<br>0.025 (U/mg<br>protein)<br>GSH-Px: 0.753<br>±0.048 (U/mg<br>protein)                             | mouse                      | [90]  |



|                                          |                                                                                                                                                                                                                                          |     |                     |            |                                                                                                                                                           |       |       |
|------------------------------------------|------------------------------------------------------------------------------------------------------------------------------------------------------------------------------------------------------------------------------------------|-----|---------------------|------------|-----------------------------------------------------------------------------------------------------------------------------------------------------------|-------|-------|
| <i>Coptis chinensis</i><br>inflorescence | P38: 1.5%<br>p-P38: 0.5 %<br>ERK: 2%<br>p-ERK: 0.2 %<br>JNK: 1 %<br>p-JNK: 0.8 %<br>Keap1: 1.6 %<br>Nrf2: 1%<br>NQO1:1.4%<br>GST: 0.8 %<br>HO-1: 1.3 %                                                                                   | MTT | In vitro            | CE-treated | 100μl                                                                                                                                                     | mice  | [71]  |
| Purchased                                | IL-2 secretion:<br>(80,81)(U/ml )<br>IL-4: 2 ng/ml<br>IL-5: 3.5 ng/ml<br>IL-10: 5 ng/ml<br>MIP-1α: (13~20)(ng/ml)<br>MIP-1β: (13~21)(ng/ml)<br>RANTES: (2~3)(ng/ml)<br>P24 in Vδ1(-):<br>(8~10)(ng/ml)<br>P24 in Vδ1(+):<br>(4~7)(ng/ml) | –   | –                   | DMSO       | CFSE in Vδ1<br>cells:50%<br>CFSE in<br>Vδ2cell:70%<br>CFSE in αβT<br>cell:25%<br>CD25 in<br>Vδ1:50%<br>CD25 in Vδ2<br>cell:85%<br>CD25 in αβT<br>cell:20% | cell  | [109] |
| <i>Chrysanthemum morifolium</i>          | cell viability: 94.1 ± 5.7%<br>γ-irradiated A549 cells:<br>80 %                                                                                                                                                                          | MTT | In vivo             | –          | –                                                                                                                                                         | human | [95]  |
| <i>Cirsium japonicum</i>                 | 90HCJ :(3.02 ±<br>0.12)(mg/g DW)<br>70HCJ: (3.24 ±<br>0.06)(mg/g DW)<br>SCJ: (4.11 ± 0.02)(mg/g<br>DW)                                                                                                                                   | MTT | In vivo<br>In vitro | DMSO       | –                                                                                                                                                         | rat   | [83]  |

|                             |                                 |                                                                                                                                          |                    |                     |                   |                                                                              |                                                      |
|-----------------------------|---------------------------------|------------------------------------------------------------------------------------------------------------------------------------------|--------------------|---------------------|-------------------|------------------------------------------------------------------------------|------------------------------------------------------|
| FCJ: (6.96 ± 0.02)(mg/g DW) |                                 |                                                                                                                                          |                    |                     |                   |                                                                              |                                                      |
|                             | <i>Jatropha pelargoniifolia</i> | -                                                                                                                                        | MTT                | In vitro            | Cytotoxicity IC50 | 25.16 ± 1.5*<br>13.17 ± 0.9                                                  | A549 human lung [116]                                |
|                             | purchased                       | bone resorption:(100,60,20)%<br>RANKL:(3.5,3,2.5)pg/ml                                                                                   | MTT                | In vivo<br>In vitro | -                 | -                                                                            | mouse [88]                                           |
|                             | <i>Mentha haplocalyx</i>        | PEG concentration:(98,60,60,70,48)%<br>(NH4)2SO4:80%                                                                                     | ATPF               | -                   | -                 | -                                                                            | rat [84]                                             |
| <b>Anti-chlamydial</b>      | <i>Mentha arvensis</i>          | H.C.V.: 99.0 ± 2.0% (at C: 100 µM)<br>H.C.V.: 97.0 ± 1.3% (at C: 10 µM)                                                                  | nd                 | In vitro            | -                 | -                                                                            | <i>Chlamydia pneumoniae</i> cell line (CWL-029) [47] |
| <b>Anticonvulsant</b>       | <i>Chrysanthemum boreale</i>    | sleeping latency: (2.8,2.9)min<br>total duration: (95,110) min<br>onset time:(80,90)sec<br>T. E: (220,240)sec<br>Mortality:(290,320) sec | HPLC               | In vivo             | Chloropromazine   | Onest time: 43.7 ± 4.81 s<br>T.E :163.7 ± 7.43 s<br>Mortality:200.4 ± 13.9 s | pentobarbital-induced mice [86]                      |
| <b>Antidepressant</b>       | purchased                       | N.D. (at D: 14 mg/kg)                                                                                                                    | Locomotor activity | In vivo             | -                 | -                                                                            | mice [85]                                            |
|                             | <i>Cirsium japonicum</i>        | I.D.: 110 s (at D: 10 mg/kg)                                                                                                             | Forced swimming    | In vivo             | Imipramine        | I.D.: 90 s (at 5 mg/kg)                                                      | mice [118]                                           |
| <b>Antidiabetic</b>         | Purchased                       | leukocyte rolling: 15 tes/6mm <sup>2</sup><br>eukocyte sticking: 8 tes/6mm <sup>2</sup><br>FCD:41<br>venular diameter: 75µM              | femoral vein       | In vivo             | -                 | -                                                                            | Hamster [105]                                        |

|                           |                                       |                                                                                                                                                                                                                                  |   |          |                            |                              |                                               |       |
|---------------------------|---------------------------------------|----------------------------------------------------------------------------------------------------------------------------------------------------------------------------------------------------------------------------------|---|----------|----------------------------|------------------------------|-----------------------------------------------|-------|
|                           | <i>Chrysanthemum zawadskii</i>        | HBA1C: (4.9~5)%<br>AUC glucose:<br>(2800~3000)<br>scored for atrophy:<br>(3~3.5)                                                                                                                                                 | - | In vivo  | metformin<br>hydrochloride | Insulin:<br>(480~500)(pg/DI) | mice                                          | [98]  |
|                           |                                       | MIC: >125 µg/mL                                                                                                                                                                                                                  |   |          |                            | MIC: 0.250<br>µg/mL          | <i>Candida albicans</i><br>(ATCC-10231)       |       |
| Antifungal                | <i>Lippia rubella</i>                 | MIC: >125 µg/mL                                                                                                                                                                                                                  | - | In vitro | Amphotericin B             | MIC: 0.125<br>µg/mL          | <i>C. parasilopsis</i><br>(ATCC-22019)        | [73]  |
|                           |                                       | MIC: 125 µg/mL                                                                                                                                                                                                                   |   |          |                            | MIC: 0.125<br>µg/mL          | <i>Cryptococcus<br/>neoformans</i><br>(T1444) |       |
|                           | <i>Chrysanthemum morifolium</i> Ramat | S.B.P.: 97.5% (at D: 25<br>mg/kg)                                                                                                                                                                                                | - | In vivo  | Captopril                  | -                            | rat                                           | [132] |
|                           |                                       | D.B.P.: 99% (at D: 25<br>mg/kg)                                                                                                                                                                                                  |   |          |                            |                              |                                               |       |
| Anti-<br>hypersensitivity | <i>Chrysanthemum indicum</i>          | S.B.P.: 170% (at D:<br>75mg/kg, 1 <sup>st</sup> week)<br>S.B.P.: 175% (at D:<br>75mg/kg, 2 <sup>nd</sup> week)<br>S.B.P.: 185% (at D:<br>75mg/kg, 4 <sup>th</sup> week)<br>S.B.P.: 182% (at D:<br>75mg/kg, 6 <sup>th</sup> week) |   | In vivo  | -                          | -                            | rat                                           | [36]  |



---

S.B.P.: 175% (at D:  
150mg/kg, 1<sup>st</sup> week)  
S.B.P.: 172% (at D:  
150mg/kg, 2<sup>nd</sup> week)  
S.B.P.: 180% (at D:  
150mg/kg, 4<sup>th</sup> week)  
S.B.P.: 183% (at D:  
150mg/kg, 6<sup>th</sup> week)

D.B.P.: 130% (at D:  
75mg/kg, 1<sup>st</sup> week)  
D.B.P.: 132% (at D:  
75mg/kg, 2<sup>nd</sup> week)  
D.B.P.: 138% (at D:  
75mg/kg, 4<sup>th</sup> week)  
D.B.P.: 140% (at D:  
75mg/kg, 6<sup>th</sup> week)

D.B.P.: 130% (at D:  
150mg/kg, 1<sup>st</sup> week)  
D.B.P.: 130% (at D:  
150mg/kg, 2<sup>nd</sup> week)  
D.B.P.: 138% (at D:  
150mg/kg, 4<sup>th</sup> week)  
D.B.P.: 135% (at D:  
150mg/kg, 6<sup>th</sup> week)

M.A.P.: 144% (at D:  
75mg/kg, 1<sup>st</sup> week)  
M.A.P.: 146% (at D:  
75mg/kg, 2<sup>nd</sup> week)

---

|                   |                         |                                                                                                                                                                                                                                      |                     |          |                                                                                                                                           |                                                                                                                          |               |       |
|-------------------|-------------------------|--------------------------------------------------------------------------------------------------------------------------------------------------------------------------------------------------------------------------------------|---------------------|----------|-------------------------------------------------------------------------------------------------------------------------------------------|--------------------------------------------------------------------------------------------------------------------------|---------------|-------|
|                   |                         | M.A.P.: 155% (at D:<br>75mg/kg, 4 <sup>th</sup> week)<br>M.A.P.: 155% (at D:<br>75mg/kg, 6 <sup>th</sup> week)                                                                                                                       |                     |          |                                                                                                                                           |                                                                                                                          |               |       |
|                   |                         | M.A.P.: 147% (at D:<br>150mg/kg, 1 <sup>st</sup> week)<br>M.A.P.: 145% (at D:<br>150mg/kg, 2 <sup>nd</sup> week)<br>M.A.P.: 152% (at D:<br>150mg/kg, 4 <sup>th</sup> week)<br>M.A.P.: 150% (at D:<br>150mg/kg, 6 <sup>th</sup> week) |                     |          |                                                                                                                                           |                                                                                                                          |               |       |
| Anti-inflammatory | <i>Buddleia cordata</i> | —                                                                                                                                                                                                                                    | —                   | In vitro | Acanthamoeba<br>polyphaga<br>:4.0,2.0,0.25,0.031<br>25,0.125 mg/ml<br>Acanthamoeba<br>castellanii:<br>0.5,4.0,0.25,16.0,0.<br>03125 mg/ml | cell                                                                                                                     | [57]          |       |
|                   | purchased               | Linarin:0, 2.5 , 5 , 20 , 40<br>(µg/ml)(ConA :10 µg/ml<br>)<br>Linarin:0, 2.5 , 5 , 20 , 40<br>(µg/ml)(LPS:50 µg/ml )<br>Linarin: (6.25, 12.5, 25,<br>50,100<br>µg/ml)(LPS:10ng/ml)                                                  | -                   | In vivo  | LPS-Induced<br>Cytokine<br>RAW 264.7                                                                                                      | C.V.M:(ConA)(li<br>narin:2.5 µg/ml )<br>2.4<br>C.V.M:(LPS)(lina<br>rin 0 µg/ml) 0.6<br>N:(LPS)(linarin 0<br>µg/ml):43 uM | mice          | [129] |
|                   | <i>Buddleia cordata</i> | Linarin:(2.5 mg/kg )<br>46.5%                                                                                                                                                                                                        | Extract of<br>plant | In vivo  | —                                                                                                                                         | IA: 89.0 (73.7—11<br>0.0) mg/kg<br>A: 0.6 mg/kg                                                                          | Mice and rats | [130] |

|                                |                                                                                                                                                                                                                                                 |            |                     |                            |                                                                                                       |              |       |
|--------------------------------|-------------------------------------------------------------------------------------------------------------------------------------------------------------------------------------------------------------------------------------------------|------------|---------------------|----------------------------|-------------------------------------------------------------------------------------------------------|--------------|-------|
|                                | Linarin: (10 mg/kg)<br>66.5%                                                                                                                                                                                                                    |            |                     |                            |                                                                                                       |              |       |
|                                | Linarin: (10 mg/kg)<br>82.6%                                                                                                                                                                                                                    |            |                     |                            |                                                                                                       |              |       |
| purchased                      | linarin (0, 5, 10, 20, or 30 $\mu$ M) for 24 h                                                                                                                                                                                                  | MTT method | In vitro            | RAW264.7 macrophages       | -                                                                                                     | mouse        | [133] |
| <i>Chrysanthemum zawadskii</i> | TRAP+ MNCs/well : 450 (linarin:0 $\mu$ M)<br>320(linarin:1 $\mu$ M)<br>180(linarin:3 $\mu$ M)<br>120(linarin:10 $\mu$ M)                                                                                                                        | EMSA       | vitro and in vivo   | Collagen-Induced Arthritis | AI:6.1 $\pm$ 1.99 at 1 mg/kg,<br>4.7 $\pm$ 1.12 at 10 mg/kg, and 2.8 $\pm$ 1.09 at 100 mg/kg(41 days) | mice         | [134] |
| <i>Mentha haplocalyx</i>       | IL-1 $\beta$ : (50,45,35,32) (pg/ml)<br>TNF- $\alpha$ : (7000,5800,4000,4500)(pg/ml)<br>IL-6: (14800,14750,12000,10000)(pg/ml)<br>p-I $\kappa$ B $\alpha$ : (0.4,1,0.8,0.7,0.7)(30 min)<br>p-I $\kappa$ B $\alpha$ : (0.3,0.5,0.4,0.2,0.1)(4 h) | -          | In vitro            | RAW264.7                   | CV:O(65~110)(%)                                                                                       | Mouse        | [76]  |
| <i>Cirsium japonicum</i>       | -                                                                                                                                                                                                                                               | MTT        | In vivo<br>In vitro | Dexamethasone (DXM)        | NI: (10,15,20)(%)                                                                                     | rat          | [17]  |
| <i>Cirsium japonicum</i>       | -                                                                                                                                                                                                                                               | -          | -                   | LPS                        | CV: ( 83.35 $\pm$ 2.22)(%)<br>NI: ( 10.33 $\pm$ 1.61)(%)                                              | Rat<br>mouse | [20]  |

|                                 |                                                                                                                                                                                                                                                                       |                             |                     |                                              |                                                       |                           |       |
|---------------------------------|-----------------------------------------------------------------------------------------------------------------------------------------------------------------------------------------------------------------------------------------------------------------------|-----------------------------|---------------------|----------------------------------------------|-------------------------------------------------------|---------------------------|-------|
| IP: ( 36.19 ± 16.17)(%)         |                                                                                                                                                                                                                                                                       |                             |                     |                                              |                                                       |                           |       |
| purchased                       | -                                                                                                                                                                                                                                                                     | lucigenin chemiluminescence | In vivo<br>In vitro | LPS                                          | LI: (4,3.5,2.1,1.5)<br>CD41:<br>(43,30,20,15)(%)      | mice                      | [135] |
| <i>Buddlejae Flos</i>           | NO: 100~125 μmol/L<br>TNF-α: 30~40 pg/mL<br>IL-1β: 20~25 pg/mL<br>(20,40,80)μM                                                                                                                                                                                        | HSCCC                       | In vivo             | HUVEC and LPS                                | -                                                     | human                     | [136] |
| <i>Flos Chrysanthemi Indici</i> | NO concentrations<br>(20,13,10) μM<br>PGE2:(290,250,190)pg/ml                                                                                                                                                                                                         | -                           | In vitro            | LPS                                          | -                                                     | RAW264.7 macrophage cells | [92]  |
| purchased                       | IL-6:(150,130,100,75)pg/ml<br>TNF-α:(170,140,100,75)pg/ml<br>PGE2:(800,700,600,400)pg/ml<br>NO:(200,160,140,100)pg/ml<br>Collagen II:(2000,2500,3000,3200)pg/ml<br>Aggrecan:(500,600,650,700)pg/ml<br>MMP13:(250,210,180,130)pg/ml<br>ADAMTS-5:(500,430,380,300)pg/ml |                             | In vivo<br>In vitro | IkBα in cytoplasm and p65 in nuclear<br>TLR4 | P65:(3,2,1)<br>IkBα :(0.25,0.6,1)<br>TLR4:(2.5,1.8,1) | human                     | [89]  |
| purchased                       | cell viability:100%<br>NO:(20,18,15,12)μM                                                                                                                                                                                                                             | TCMSP                       | In vitro            | -                                            | -                                                     | Mouse                     | [93]  |

|                               |                                                      |                                                                                                                                                                                                                                                    |                                            |          |                                                            |                                                                                                                                                                                          |                               |       |
|-------------------------------|------------------------------------------------------|----------------------------------------------------------------------------------------------------------------------------------------------------------------------------------------------------------------------------------------------------|--------------------------------------------|----------|------------------------------------------------------------|------------------------------------------------------------------------------------------------------------------------------------------------------------------------------------------|-------------------------------|-------|
| TNF- $\alpha$ :(380,420)pg/ml |                                                      |                                                                                                                                                                                                                                                    |                                            |          |                                                            |                                                                                                                                                                                          |                               |       |
|                               | <i>Flos Chrysanthemi indica</i>                      | liver index<br>comparison:(0.055,0.048,<br>0.052)<br>TC content:15 $\mu$ mole/mg<br>protein<br>Relative FSN mRNA<br>level:(075,0.6,0.5)<br>Relative SCD1 mRNA<br>level:(50,55,78)                                                                  | -                                          | -        | SEM                                                        | TG (mmol/L):<br>1.00 $\pm$ 0.29<br>TC (mmol/L) 1.98<br>$\pm$ 0.26<br>HDL-c (mmol/L)<br>0.96 $\pm$ 0.12<br>GLU (mmol/L)<br>3.83 $\pm$ 0.59<br>LDL-c (mmol/L)<br>0.82 $\pm$ 0.14           | rat                           | [97]  |
| <b>Antipyretic</b>            | <i>Buddleia cordata</i>                              | I: 46.4% (at D: 10 mg/kg)<br>I: 69.0% (at D: 50 mg/kg)<br>I: 86.6% (at D: 100 mg/kg)                                                                                                                                                               | yeast-<br>induced<br>hyperthermi<br>a test | In vivo  | Acetaminophen                                              | I: 68.0% (at D:<br>200 mg/kg)                                                                                                                                                            | rat                           | [101] |
| <b>Anti-Osteoarthritic</b>    | <i>Chrysanthemum zawadskii</i> var. <i>latilobum</i> | IL-1 $\beta$ :30pg/ml<br>TNF- $\alpha$ :130pg/ml                                                                                                                                                                                                   |                                            |          | MMPs<br>Sox9                                               | 1,2,1.5<br>1,1.5,1.3                                                                                                                                                                     | Human                         | [75]  |
| <b>Antivirus</b>              | prepared                                             | Lb:50%(at D:40 $\mu$ g/ml)<br>Lb:60%( at D:20 $\mu$ g/ml)<br>Lb:75%( at D:10 $\mu$ g/ml)<br>LB: 35%(at D:5 $\mu$ g/ml)<br>LT:40%(at D:40 $\mu$ g/ml)<br>LT:50 %( at D:20 $\mu$ g/ml)<br>LT:60%( at D:10 $\mu$ g/ml)<br>LT: 40%(at D:5 $\mu$ g/ml)# | MTT<br>method                              | in vitro | 5lg/mL<br>significantly<br>increased T and<br>B lymphocyte | I: 1 $\mu$ g/ml (5<br>min)<br>BLIN treating:<br>0.6 $\mu$ g/ml<br>I: 0.98 $\mu$ g/ml (2h)<br>BLIN treating: 1<br>$\mu$ g/ml<br>I: 1 $\mu$ g/ml (10h)<br>BLIN treating:<br>0.3 $\mu$ g/ml | duck virus hepatitis<br>(DVH) | [106] |
|                               | purchased                                            | C.S: 70 U/mL (IL.2-on<br>clone 1C116 and 2C21)                                                                                                                                                                                                     | -                                          | In vitro | V $\delta$ 1-TCR or<br>V $\delta$ 2-TCR                    | V $\delta$ 1:45%<br>V $\delta$ 2:85%<br>$\alpha\beta$ T:20%                                                                                                                              | HIV-1 in CD4+ NKT<br>cells    | [109] |

|                           |                                              |                                                                                                                                                                                                                                                                                        |                                        |                     |                                    |                                          |                                   |       |
|---------------------------|----------------------------------------------|----------------------------------------------------------------------------------------------------------------------------------------------------------------------------------------------------------------------------------------------------------------------------------------|----------------------------------------|---------------------|------------------------------------|------------------------------------------|-----------------------------------|-------|
|                           |                                              | C.S: 72 U/mL (IL-2-on clone 1C116)<br>C.S: 18 ng/ml (at linarin: 100 µg/ml) (MIP-1β)<br>C.S: 15 ng/ml (at linarin: 100 µg/ml) (MIP-1α)<br>C.S: 7 ng/ml (at linarin: 10 µg/ml) (IL-13)<br>C.S: 5 ng/ml (at linarin: 100 µg/ml) (IL-5)<br>C.S: 2.8 ng/ml (at linarin: 100 µg/ml)(RANTES) |                                        |                     |                                    |                                          |                                   |       |
|                           | purchased                                    | TNF-α: 40 pg/ml                                                                                                                                                                                                                                                                        | CDOCKER                                | In vivo<br>In vitro | OD                                 | –                                        | cell                              | [110] |
| <b>Cell protectivity</b>  | prepared                                     | BLIN:20,10,5,2.5 µg/ml                                                                                                                                                                                                                                                                 | MTT method                             | In vitro<br>in vivo | hepatoprotective and antioxidative | I:69.3%<br>Treat:35.5%                   | duck virus hepatitis (DVH)        | [107] |
| <b>Estrogenic</b>         | <i>Cirsium japonicum</i> var. <i>maackii</i> | Linarin:10,30,100 µg/ml                                                                                                                                                                                                                                                                | Extract of plant                       | In vitro            | estrogen receptor (ER)             | Relative ER activity:100 %               | human breast cancer (MCF-7)       | [19]  |
| <b>Neuroprotective</b>    | <i>Valeriana officinalis</i>                 |                                                                                                                                                                                                                                                                                        | Rotenone method and new genomic method | In vitro            | binding SUR1                       | (TH): -9.3 Kcal/mol<br>SUR:-5.9 Kcal/mol | human PD brain                    | [82]  |
|                           | <i>Buddleja scordioides</i>                  | UV_B: 312 nm(0,20,40,40,80 min)                                                                                                                                                                                                                                                        | Extract of plant                       | In vitro            | Escherichia coli                   | Time: 80 min(log 0)                      | guinea pigs                       | [137] |
| <b>Photo protectivity</b> | <i>Buddleja scordioides</i>                  | BCME:5-300 µg/ml<br>UVB 224, 290 and 324: nm                                                                                                                                                                                                                                           | Extract of plant                       | In vitro<br>In vivo | SKH-1                              | -                                        | mice                              | [94]  |
| <b>Phytotoxicity</b>      | <i>Zanthoxylum affine</i>                    | ATP synthesis:(40~100)%                                                                                                                                                                                                                                                                | Holm–Sidak and Dunn’s method           | In vivo<br>In vitro | DCMU                               | L. sativa (:0.29 ± 0.03)g (58.4 ± 6.0)%  | Lactuca sativa and Lolium perenne | [72]  |

|                        |                                  |                                  |                                  |         |                           |                                                                                                                                  |            |       |
|------------------------|----------------------------------|----------------------------------|----------------------------------|---------|---------------------------|----------------------------------------------------------------------------------------------------------------------------------|------------|-------|
|                        |                                  | Electron transport:<br>(55~100)% |                                  |         |                           | L. perenne: (0.95<br>± 0.04)g(69.0 ±<br>2.9)%                                                                                    |            |       |
|                        | purchased                        | V.R.: 75% (at D: 7<br>mg/kg)     | hole board                       | In vivo | -                         | -                                                                                                                                | mice       | [85]  |
|                        | <i>Valeriana officinalis</i>     | LN: 4,7,14 mg/kg                 | Extract of<br>plant              | In vivo | -                         | Sleeping time<br>median,<br>interquartile<br>range: 0 ,<br>1700,900(s)                                                           | Swiss mice | [126] |
| <b>Sedative effect</b> | <i>Valeriana officinalis</i>     | LN:2.0,6.0,12,0 mg/kg            | —                                | In vivo | -                         | Cumulative<br>activity:<br>1254 ± 130 (s)<br>1335 ± 134 (s)<br>1197 ± 151 (s)                                                    | mice       | [138] |
|                        | <i>Chrysanthemum<br/>boreale</i> | LN:10,20 mg/kg                   | -                                | In vivo | pentobarbital-<br>induced | Total<br>duration:98,103<br>(min)                                                                                                | mice       | [86]  |
| <b>Sleep enhancing</b> | purchased                        | S.T.: 1320 s (at D: 14<br>mg/kg) | Sodium<br>thiopental-<br>induced | In vivo | -                         | -                                                                                                                                | mice       | [85]  |
| <b>Spasmolytic</b>     | <i>Leonards japonicus</i>        | —                                | —                                | In vivo | uterine smooth<br>muscle  | contractile<br>activity:<br>(5.7.11)g*n/10<br>min<br>contractile<br>tension:<br>(0.2,0.5,0.8)(ΔT,g)<br>contractile<br>frequency: | rat        | [50]  |

|                                                            |           |                                                                                                       |      |                     |      |            |     |      |
|------------------------------------------------------------|-----------|-------------------------------------------------------------------------------------------------------|------|---------------------|------|------------|-----|------|
| (0.6,0.9,1.2)(F,<br>n/10 min)                              |           |                                                                                                       |      |                     |      |            |     |      |
| <b>Kidney against<br/>Ischemia/Reperfu<br/>sion Injury</b> | purchased | BUN:40<br>SCr:110<br>KIM-1:2.8<br>IL-12                                                               | CCK8 | In vivo<br>In vitro | DMSO | $p < 0.05$ | rat | [91] |
|                                                            |           | p40 mRNA:1.5<br>relative mRNA<br>expression $\mu\text{M}$ ,:<br>(20,30,40) $\mu\text{M}$<br>(3.5,3,2) |      |                     |      |            |     |      |

A: anti-inflammatory activity, ALP: alkaline phosphatase, AUC: area under the curve, AI: arthritis index, A.W.: Average writhing, BCME: *Buddleja cordata* methanolic extract, BHT: butylated hydroxytoluene, BSP: bone sialoprotein, BUN: blood urine nitrogen, C: concentration, ConA: concanavallin A, CP: cell proliferation, CS: cytokine secretion, CV: cell viability, CVM: cell viability max, D: dosage, DBP: diastolic blood pressure, D.L.: detection limit, DRR: Dyskinesia recovery rate, EMSA: electrophoretic mobility shift assay, FBS: fatal bovine serum, FCD: functional capillary density, FCJ: freeze-dried, HCJ: hot-air-dried at 90 °C, HCV: host cell viability, HUVEC: human umbilical vein endothelial cell, I: inhibition, IA: inhibition of abdominal writhing, I.D.: Inhibition dosage, ID: immobile duration, IP: inhibition PGE2, IS: infarct size, LI: lung injury, LN: linarin, LPS: lipopolysaccharide, M: mineralization, MAP: mean arterial pressure, MDA: malondialdehyde; MIC: minimum inhibitory concentration, N: nitrite, nd: not determined, NI: no inhibition, OCN: Osteocalcin, P: protection, P\_Bim: Bim phosphorylation, P\_STAT3: STAT3 phosphorylation, PCO: protein carbonyl; PD: Parkinson's disease, RANKL: receptor activator of nuclear factor-kB ligand; RC: relative activity of Caspase-3 on H2C9, RHR: relative histamine release, RP: relative activity of proliferation on H9C2, RR: relative amount of ROS, RUNX2: runt related transcription factor 2, SBP: systolic blood pressure, SCJ: shade-dried, SCr: serum creatinine, ST: sleeping time, TH: tyrosine hydroxylase, V: variation, VR: vehicle response.
